# Supplementary material
Source: MDPI journal article supplement (https://www.mdpi.com/2311-7524/9/2/275)
Supplement: s1 [file s1]

Supplementary Materials

# Stepwise Optimization of the RT-qPCR Protocol and the Evaluation of Housekeeping Genes in Pears (*Pyrus bretschneideri*) under Various Hormone Treatments and Stresses

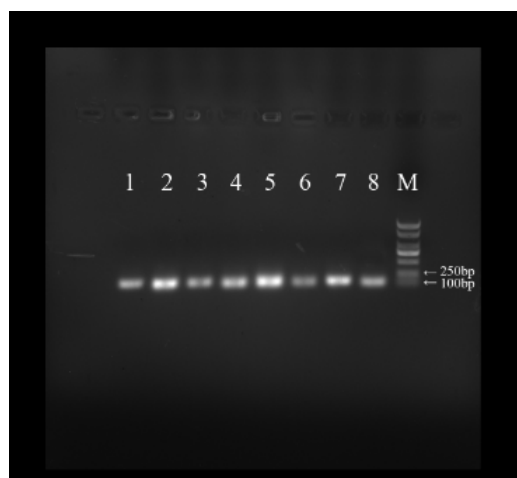

**Figure S1.** Amplified fragments of candidate reference genes shown by agarose gel electrophoresis on optimal PCR amplicons in pear leaves under control condition. Lanes 1, 2, 3, 4, 5, 6, 7 and 8 were the genes of *ACT*, *SKD1*, *YLS8*, *WDP*, *TUB*, *UBQ*, *GAPDH* and *EF1α*. M marker 2000 (in ascending order: 100, 250, 500, 750, 1000, 1500 and 2000 bp). *ACT*, actin; *SKD1*, suppressor of K<sup>+</sup> transport growth defect 1; *YLS8*, thioredoxin-like protein 8; *WDP*, WD-repeat protein; *TUB*, tubulin; *UBQ*, ubiquitin; *GAPDH*, glyceraldehyde-3-phosphate dehydrogenase; *EF1α*, elongation factor 1 alpha.

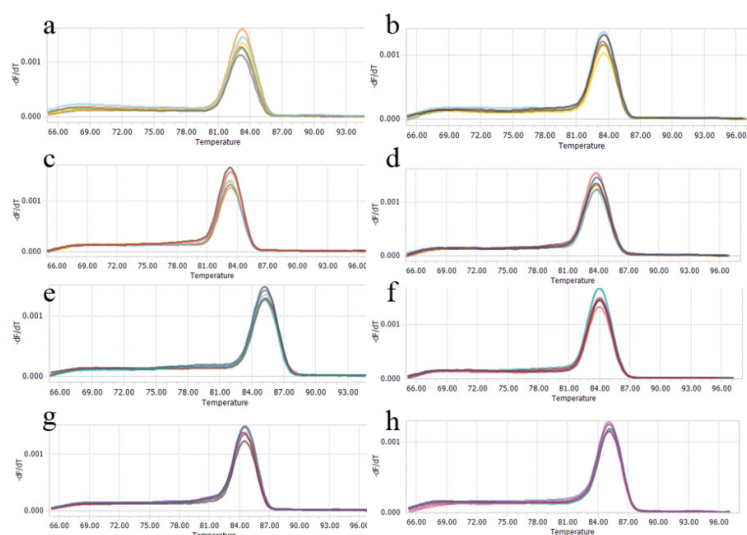

**Figure S2.** The analysis of specific primers and PCR efficiency for eight reference genes in pear leaves under control condition. Melting curves of reference genes showing single peaks. (a)*ACT*, (b)*SKD1*, (c)*YLS8*, (d)*WDP*, (e) *TUB*, (f)*UBQ*, (g) *GAPDH*, (h)*EF1α*.

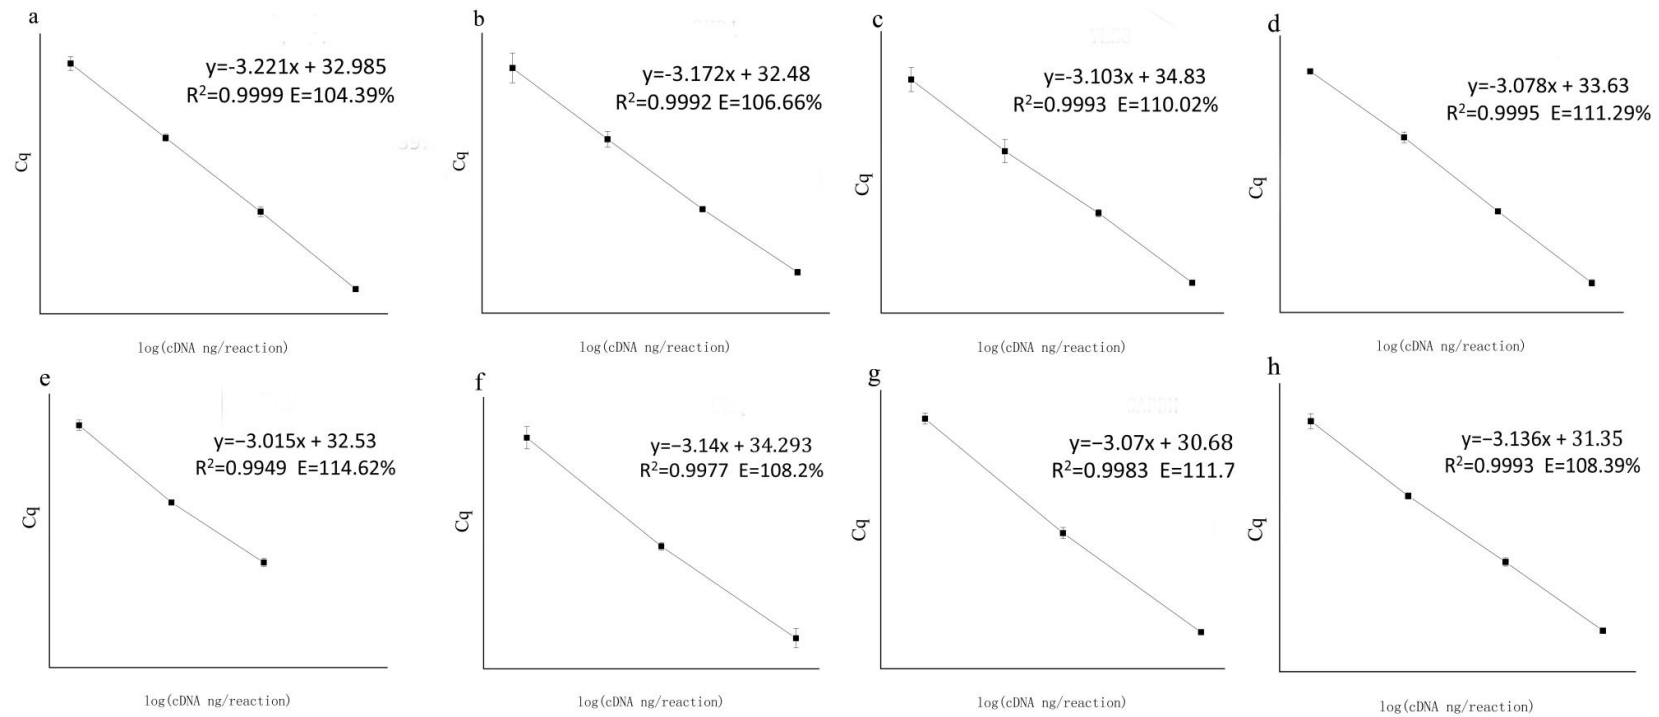

**Figure S3.** The plot of the averaged Cq values of three technical replicates against the Log (cDNA in ng/reaction) for optimizing qPCR conditions for each candidate reference genes in pears. One of the data cDNA concentration might have been omitted in order to obtain  $R^2 \geq 0.99$  and  $E = 100 \pm 10\%$ . **a** ACT, **b** SKD1, **c** YLS8, **d** WDP, **e** TUB, **f** UBQ, **g** GAPDH, **h** EF1α.

**Table S1.** Primer sequences used for qRT-PCR and the details of optimized protocol.

| Gene         | Sequence ID  | Primer sequences (5' –3' ) | Primer length | Tm    | GC%   | Amplicon length(bp) | annealing Temperature (° C) | Ct values of qPCR under different primers concentration(250/300/350/400mM) |
|--------------|--------------|----------------------------|---------------|-------|-------|---------------------|-----------------------------|----------------------------------------------------------------------------|
| <i>ACT</i>   | GU830958     | GTGCCCAGAAGTCCTCTTCC       | 20            | 60.04 | 60.00 | 139                 | 60                          | 26.94/26.75/26.79/ <b>26.74</b>                                            |
|              |              | CCCACCACTAAGCACGATGT       | 20            | 60.04 | 55.00 |                     |                             |                                                                            |
| <i>SKD1</i>  | XM009366023  | CTTCCGCCTCCTATCAC          | 17            | 53.46 | 58.82 | 127                 | 60                          | 25.76/25.74/25.86/ <b>25.73</b>                                            |
|              |              | TTCATCACCTTCCTCT           | 17            | 50.86 | 47.06 |                     |                             |                                                                            |
| <i>YLS8</i>  | XM009353468  | TGAGGTGCTGGCTTCTGT         | 18            | 58.43 | 55.56 | 119                 | 60                          | 28.42/ <b>28.17</b> /28.29/28.51                                           |
|              |              | TGACCGTTGATGGATCGTA        | 19            | 55.86 | 47.37 |                     |                             |                                                                            |
| <i>WDP</i>   | Pbr038544    | TCCACCGGCGAAGATATCAG       | 20            | 59.33 | 55.00 | 85                  | 60                          | 26.66/26.75/26.46/ <b>26.39</b>                                            |
|              |              | CAGAAGGTTTCGGCTCCATCA      | 20            | 59.75 | 55.00 |                     |                             |                                                                            |
| <i>TUB</i>   | Pbr042345    | GTTCCAGAGCTCACTCAGCA       | 20            | 59.68 | 55.00 | 114                 | 60                          | 26.06/26.14/ <b>25.98</b> /26.02                                           |
|              |              | GGTGCTCATCTTACCACGGA       | 20            | 59.46 | 55.00 |                     |                             |                                                                            |
| <i>UBQ</i>   | Pbr008614    | GCCGAATCTCCCCCAATCTC       | 20            | 60.25 | 60.00 | 88                  | 60                          | 27.89/27.65/ <b>27.4</b> /27.6                                             |
|              |              | AGGGTTATCGTCTTCCCCGT       | 20            | 60.33 | 55.00 |                     |                             |                                                                            |
| <i>GAPDH</i> | Pbr036263    | AGGGTTATCGTCTTCCCCGT       | 20            | 60.33 | 55.00 | 118                 | 60                          | 24.88/ <b>24.45</b> /24.77/24.78                                           |
|              |              | CCCTCAACAATCCCAAACC        | 19            | 56.07 | 52.63 |                     |                             |                                                                            |
| <i>EF1α</i>  | XM_009376302 | GCATCCAACCTCAAGGACGA       | 20            | 60.04 | 55.00 | 91                  | 60                          | <b>25.14</b> /25.36/25.48/25.29                                            |
|              |              | CGTTACCGATCTGACCAGGG       | 20            | 59.90 | 60.00 |                     |                             |                                                                            |

**Table S2.** The Ct value of the reference genes of pear leaves under various experimental treatments. Ct, the average Ct value of each candidate reference gene under different conditions. SD, the standard deviation. CV, coefficient of variation. Three biological replicates per sample were used. **A** under hormones treatments. **B** under biotic and abiotic stresses treatments.

| <b>A</b>     |                     |      |        |       |      |        |       |      |        |               |      |        |          |      |        |
|--------------|---------------------|------|--------|-------|------|--------|-------|------|--------|---------------|------|--------|----------|------|--------|
| Gene         | MOCK                |      |        | SA    |      |        | MeJA  |      |        | ETH           |      |        | ABA      |      |        |
|              | Ct                  | SD   | CV (%) | Ct    | SD   | CV (%) | Ct    | SD   | CV (%) | Ct            | SD   | CV (%) | Ct       | SD   | CV (%) |
| <i>ACT</i>   | 21.68               | 0.84 | 3.88   | 23.55 | 1.73 | 7.35   | 27.17 | 0.91 | 3.35   | 24.29         | 2.42 | 9.97   | 23.20    | 2.86 | 12.31  |
| <i>SKDI</i>  | 20.73               | 0.60 | 2.89   | 22.03 | 1.29 | 5.88   | 23.55 | 1.98 | 8.40   | 20.94         | 0.50 | 2.37   | 20.12    | 0.98 | 4.89   |
| <i>YLS8</i>  | 22.72               | 0.23 | 1.02   | 24.23 | 1.64 | 6.76   | 26.29 | 1.95 | 7.43   | 23.54         | 1.61 | 6.84   | 22.81    | 1.88 | 8.24   |
| <i>WDP</i>   | 22.36               | 0.64 | 2.85   | 23.91 | 1.71 | 7.15   | 25.95 | 1.40 | 5.38   | 23.49         | 1.23 | 5.22   | 22.47    | 1.54 | 6.87   |
| <i>TUB</i>   | 21.53               | 0.76 | 3.55   | 22.97 | 1.84 | 8.00   | 26.34 | 1.12 | 4.24   | 24.20         | 1.43 | 5.92   | 23.29    | 1.63 | 6.98   |
| <i>UBQ</i>   | 23.59               | 1.53 | 6.49   | 25.61 | 2.51 | 9.81   | 28.40 | 1.35 | 4.75   | 25.85         | 2.05 | 7.94   | 24.69    | 2.58 | 10.45  |
| <i>GAPDH</i> | 21.56               | 1.68 | 7.78   | 23.76 | 2.51 | 10.55  | 27.70 | 0.50 | 1.80   | 25.41         | 2.87 | 11.31  | 24.09    | 3.35 | 13.89  |
| <i>EF1α</i>  | 20.53               | 1.37 | 6.65   | 22.49 | 2.25 | 10.00  | 26.34 | 0.86 | 3.27   | 22.91         | 3.45 | 15.08  | 21.97    | 3.93 | 17.88  |
| <b>B</b>     |                     |      |        |       |      |        |       |      |        |               |      |        |          |      |        |
| Gene         | <i>V. nashicola</i> |      |        | Cold  |      |        | Heat  |      |        | Water-deficit |      |        | Salinity |      |        |
|              | Ct                  | SD   | CV (%) | Ct    | SD   | CV (%) | Ct    | SD   | CV (%) | Ct            | SD   | CV (%) | Ct       | SD   | CV (%) |
| <i>ACT</i>   | 22.68               | 1.64 | 7.22   | 27.73 | 4.09 | 14.74  | 28.01 | 2.59 | 9.26   | 27.60         | 2.66 | 9.65   | 27.02    | 3.44 | 12.75  |
| <i>SKDI</i>  | 21.39               | 1.07 | 5.00   | 23.42 | 2.75 | 11.73  | 22.42 | 2.92 | 13.04  | 26.46         | 1.75 | 6.61   | 23.76    | 2.67 | 11.24  |
| <i>YLS8</i>  | 23.56               | 1.28 | 5.43   | 28.38 | 3.59 | 12.65  | 27.20 | 4.24 | 15.57  | 26.83         | 2.01 | 7.47   | 29.35    | 4.35 | 14.83  |
| <i>WDP</i>   | 22.83               | 1.50 | 6.58   | 27.31 | 3.27 | 11.97  | 26.48 | 4.36 | 16.48  | 26.00         | 1.90 | 7.32   | 28.30    | 3.88 | 13.71  |
| <i>TUB</i>   | 22.26               | 1.70 | 7.64   | 26.86 | 3.16 | 11.77  | 27.35 | 5.19 | 18.99  | 25.16         | 1.50 | 5.97   | 27.76    | 3.86 | 13.91  |
| <i>UBQ</i>   | 24.63               | 2.24 | 9.09   | 28.30 | 2.13 | 7.52   | 28.39 | 3.55 | 12.50  | 27.02         | 0.94 | 3.46   | 29.33    | 5.22 | 17.80  |
| <i>GAPDH</i> | 23.30               | 2.62 | 11.22  | 28.25 | 2.65 | 9.38   | 28.10 | 3.09 | 10.98  | 27.17         | 1.01 | 3.72   | 28.69    | 2.71 | 9.46   |
| <i>EF1α</i>  | 21.78               | 2.18 | 10.02  | 27.05 | 2.88 | 10.65  | 27.98 | 4.93 | 17.62  | 25.55         | 1.74 | 6.80   | 28.41    | 4.24 | 14.93  |
